# Supplementary material for: Molecular “light switch” for G-quadruplexes and i-motif of human telomeric DNA: [Ru(phen)2(dppz)]2+
Source: Royal Society of Chemistry journal article supplement (doi:10.1039/b916094a), 2010-01-01
Supplement: b916094a.pdf [file b916094a.pdf]

## Electronic supplementary information

### Molecular “light switch” for G-quadruplexes and i-motif of human telomeric DNA: $[\text{Ru}(\text{phen})_2(\text{dppz})]^{2+}$

Shuo Shi, <sup>\*a</sup> Juan Zhao, <sup>a</sup> Xiaoting Geng, <sup>a</sup> Tianming Yao, <sup>\*a</sup> Hailiang Huang, <sup>a</sup> Tianlin Liu, <sup>a</sup> Lengfeng Zheng, <sup>a</sup> Zonghui Li, <sup>a</sup> Dangjing Yang, <sup>a</sup> and Liangnian Ji<sup>a,b</sup>

<sup>a</sup> *Department of Chemistry, Tongji University, Shanghai 200092, PR China*

<sup>b</sup> *MOE Laboratory of Bioinorganic and Synthetic Chemistry, School of Chemistry and Chemical Engineering, Sun Yat-Sen University, Guangzhou 510275, PR China*

### Table of contents

|                                   |            |
|-----------------------------------|------------|
| <b>Fig. s1.....</b>               | <b>S1</b>  |
| <b>Table s1.....</b>              | <b>S2</b>  |
| <b>Materials and methods.....</b> | <b>.S3</b> |

**Fig. s1**

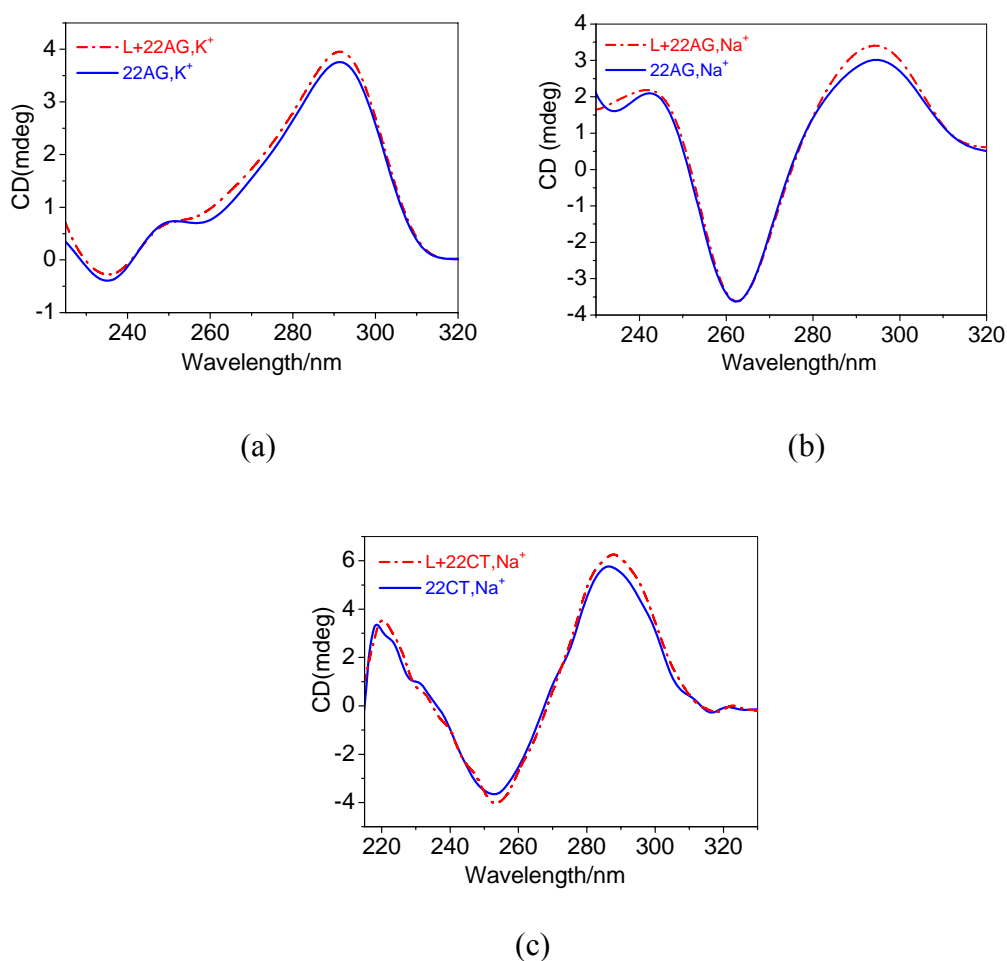

**Fig. s1** CD spectra of human telomeric DNA in the absence (solid curves) and presence of  $[\text{Ru}(\text{phen})_2(\text{dppz})]^{2+}$  (dash dot curves) pH 5.5, 25 °C..  $[\text{DNA}] = 10\mu\text{M}$ ,  $[\text{Ru}] = 50\mu\text{M}$ . (a) CD spectra of 22AG in  $\text{K}^+$  buffer; (b) CD spectra of 22AG in  $\text{Na}^+$  buffer; (c) CD spectra of 22CT in  $\text{Na}^+$  buffer.

**Table s1**

Emission spectra, absorption spectra ( $\lambda_{\text{max}}/\text{nm}$ ) and DNA binding constants  $K_b$  ( $\times 10^5 \text{ M}^{-1}$ ) of  $[\text{Ru}(\text{phen})_2(\text{dppz})]^{2+}$ .

| Complex                 | Emission spectra                   |                                     |         |                           | Absorption spectra                 |                                     |                           |         |                           |
|-------------------------|------------------------------------|-------------------------------------|---------|---------------------------|------------------------------------|-------------------------------------|---------------------------|---------|---------------------------|
|                         | $\lambda_{\text{max}}/\text{free}$ | $\lambda_{\text{max}}/\text{bound}$ | $I/I^0$ | $K_b/10^5 \text{ M}^{-1}$ | $\lambda_{\text{max}}/\text{free}$ | $\lambda_{\text{max}}/\text{bound}$ | $\Delta\lambda/\text{nm}$ | $H(\%)$ | $K_b/10^5 \text{ M}^{-1}$ |
| Hybrid quadruplex       |                                    |                                     |         |                           | 438                                | 442                                 | 4                         | 24.2    |                           |
|                         |                                    | 611                                 | 50      | 52                        | 373                                | 378                                 | 5                         | 38.2    | 65                        |
|                         |                                    |                                     |         |                           | 263                                | 265                                 | 2                         | 37.7    |                           |
| Antiparallel quadruplex |                                    |                                     |         |                           | 438                                | 442                                 | 4                         | 23.8    |                           |
|                         |                                    | 611                                 | 35      | 30                        | 373                                | 378                                 | 5                         | 38.1    | 61                        |
|                         |                                    |                                     |         |                           | 263                                | 265                                 | 2                         | 36.9    |                           |
| i-motif                 |                                    |                                     |         |                           | 438                                | 439                                 | 1                         | 13.9    |                           |
|                         |                                    | 611                                 | 11      | 4.7                       | 373                                | 375                                 | 2                         | 20.5    | 6.7                       |
|                         |                                    |                                     |         |                           | 263                                | 264                                 | 1                         | 13.2    |                           |

## Materials and methods

Materials:  $[\text{Ru}(\text{phen})_2(\text{dppz})]^{2+}$  was prepared and characterized according to the literature.<sup>1</sup> Oligonucleotides 5'-AGGGTTAGGGTTAGGGTTAGGG-3' (22AG) and its corresponding complementary strand 5'-CCCTAACCCTAACCCTAACCCT-3' (22CT), were purchased from Sangon (Shanghai, China) and used without further purification. Concentrations of these oligonucleotides were determined by measuring the absorbance at 260 nm after melting. Single-strand extinction coefficients were calculated from mononucleotide data using a nearest-neighbor approximation.<sup>2</sup> The formations of intramolecular G-quadruplexes and i-motif were carried out as follows: the oligonucleotide samples, dissolved in different buffers, were heated to 90 °C for 5 min, gently cooled to room temperature, and then incubated at 4 °C overnight. Buffer

A: 100 mM NaCl, 10 mM NaH<sub>2</sub>PO<sub>4</sub>/Na<sub>2</sub>HPO<sub>4</sub>, 1 mM Na<sub>2</sub>EDTA, pH 5.5; Buffer B: 100 mM KCl, 10 mM KH<sub>2</sub>PO<sub>4</sub>/K<sub>2</sub>HPO<sub>4</sub>, 1 mM K<sub>2</sub>EDTA, pH 5.5.

Circular dichroism measurements: Circular dichroism (CD) spectra were measured on a Jasco J-810 spectropolarimeter. The oligonucleotide samples were dissolved in the K<sup>+</sup> or Na<sup>+</sup> buffer. The corresponding samples of the DNA (22AG or 22CT) at a concentration of 10 μM were dissolved and placed in a quartz cuvette. During the titration, aliquot (1-10 μL) of [Ru(phen)<sub>2</sub>(dppz)]<sup>2+</sup> solution was added to the cuvette, and the solutions were mixed by repeated inversion. After the solutions were mixed for ~5 minutes, CD spectra were recorded. The titration processes were repeated until there was almost no change, indicating binding saturation had been achieved. For each sample, at least four spectrum scans were accumulated over the wavelength range of 200-350 nm at the temperature 25 °C in a 1.0 cm path length cell at a scanning rate of 50 nm /min. The instrument was flushed continuously with pure evaporated nitrogen throughout the experiment. The scan of the buffer alone was subtracted from the average scan for each sample.

Emission spectra: Emission spectra were measured on a Shimadzu RF-5000 spectrofluorophotometer. The excitation wavelength was 460 nm, and the emission spectrum was collected from 500 to 800 nm. Excitation and emission slits were set at 10 and 5 nm, respectively. Luminescence titrations process was similar to CD titration experiment. Luminescence titrations: A 3000 μL of [Ru(phen)<sub>2</sub>(dppz)]<sup>2+</sup> in a 1 cm path length quartz cuvette was loaded into the fluorimeter sample block, maintained at 25 °C. After 5 minutes to allow the cell to equilibrate, the first spectrum was recorded, and then 1-10 μL of DNA solution was then added to the sample cell, followed by thorough mixing. After 5 minutes, the spectrum was taken again. The titration processes were repeated until there was no change in the spectra for at least four titrations indicating binding saturation had been achieved.

The concentration of the bound compound was calculated using Eq. 1<sup>3</sup>

$$C_b = C_t[(F - F_0) / (F_{\max} - F_0)] \quad (1)$$

where  $C_t$  is the total compound concentration,  $F$  is the observed fluorescence emission intensity at given DNA concentration,  $F_0$  is the intensity in the absence of DNA, and  $F_{\max}$  is the fluorescence of the totally bound compound. Binding data were cast into the form of a Scatchard plot <sup>4</sup> of  $r/C_f$  versus  $r$ , where  $r$  is the binding ratio  $C_b/[DNA]_t$  and  $C_f$  is the free complex concentration.

**Absorption spectra titrations:** Absorption spectra titrations were carried out at room temperature to determine the binding affinity between DNA and complex. Initially, 3000  $\mu$ L solutions of the blank buffer and the ruthenium complex sample (20  $\mu$ M) were placed in the reference and sample cuvettes (1 cm path length), respectively, and then first spectrum was recorded in the range of 200-600 nm. During the titration, aliquot (1-10  $\mu$ L) of buffered DNA solution was added to each cuvette to eliminate the absorbance of DNA itself, and the solutions were mixed by repeated inversion. After the solutions were mixed for ~5 minutes, the absorption spectra were recorded. The titration processes were repeated until there was no change in the spectra for four titrations at least, indicating binding saturation had been achieved. The changes in the metal complex concentration due to dilution at the end of each titration were negligible.

In order to compare quantitatively the binding strength of  $[Ru(phen)_2(dppz)]^{2+}$  to each DNA, the intrinsic binding constants  $K_b$  with each DNA at 25 °C were obtained using the following eq. (2) <sup>5</sup>

$$\frac{\epsilon_a - \epsilon_f}{\epsilon_b - \epsilon_f} = \frac{(b - (b^2 - 2K^2C_t[DNA]/s)^{1/2})}{2KC_t} \quad (2a)$$

$$b = \frac{1 + KC_t + K[DNA]}{2s} \quad (2b)$$

where  $[DNA]$  is the concentration of DNA in base pair,  $\epsilon_a$ ,  $\epsilon_f$  and  $\epsilon_b$  are, the apparent extinction coefficient ( $A_{\text{abs}}/[M]$ ), the extinction coefficient for free metal (M) complex and the extinction coefficient for the metal (M) complex in the fully bound form,

respectively.  $K$  is the equilibrium binding constant in  $M^{-1}$ ,  $C_t$  is the total metal complex concentration, and  $s$  is the binding size.

**Thermal DNA denaturation experiments:** Thermal DNA denaturation experiments were carried out with a PerkinElmer Lambda 850 spectrophotometer equipped with a Peltier temperature-control programmer ( $\pm 0.1$ )  $^{\circ}C$ . Melting curves were collected by UV absorbance as a function of temperature. Absorbance changes at either 295 nm (G-quadruplex) or 260 nm (i-motif) vs. temperature were collected at a heating rate of  $1^{\circ}C/min$ . The data were presented as  $(A - A_0)/(A_f - A_0)$  versus temperature, where  $A_f$ ,  $A_0$ , and  $A$  are the final, the initial, and the observed absorbance at 295 or 260 nm, respectively.

**Quenching studies:** Fluorescence quenching studies were carried out using the anionic quencher potassium ferrocyanide ( $K_4Fe(CN)_6$ ]), monitoring the fluorescence intensity changes at 611 nm as a function of the quencher concentration. At least four measurements were taken and averaged. The data were plotted as  $I^0/I$  versus quencher concentration  $[Q]$  according to the Stern–Volmer equation, as described earlier.<sup>6</sup>

**Fluorescence polarization anisotropy:** The fluorescence polarization anisotropy experiment was performed as described earlier.<sup>6</sup> The samples were excited at 460 nm and the fluorescence signal was monitored at 611 nm through crossed polarizers.

## References

- 1 R. M. Hartshorn, J. K. Barton, *J. Am. Chem. Soc.*, 1992, **114**, 5919.
- 2 C. R. Cantor, M. W. Warshaw, H. Shapiro, *Biopolymers*, 1970, **9**, 1059.
- 3 S. Satyanarayana, J. C. Dabrowiak, J. B. Chaires, *Biochemistry*, 1992, **31**, 9319.
- 4 G. M. Howe, K. C. Wu, W. R. Bauer, *Biochemistry*, 1976, **19**, 339.
- 5 (a) S. R. Smith, G. A. Neyhart, W. A. Karlsbeck, H. H. Thorp, *New. J. Chem.*, 1994, **18**, 397; (b) R. B. Nair, E. S. Teng, S. L. Kirkland, C. J. Murphy, *Inorg. Chem.*, 1998, **37**, 139; (c) M. T. Carter, M. Rodriguez, A. Bard, *J. Am. Chem. Soc.*, 1989, **111**, 8901; (d) S. Shi, J. Liu, J. Li, K. C. Zheng, C. P. Tan, L. M. Chen, L. N. Ji, *Dalton. Tran.*, 2005, 2038.

6. (a) P. Giri, G. Suresh Kumar, *Mol. BioSyst.*, 2008, **4**, 341. (b) P. Giri, G. Suresh Kumar, *J. Photochem. Photobiol., A*, 2008, **194**, 111. (c) C. V. Kumar, J. K. Barton, N. J. Turro, *J. Am. Chem. Soc.*, 1985, **107**, 5518.
